# Supplementary material for: African trypanosomiasis: Synthesis & SAR enabling novel drug discovery of ubiquinol mimics for trypanosome alternative oxidase
Source: PubMed Central journal article supplement (PMC5697954; doi:10.1016/j.ejmech.2017.09.067), 2017-12-01
Supplement: mmc1.pdf [file mmc1.pdf]

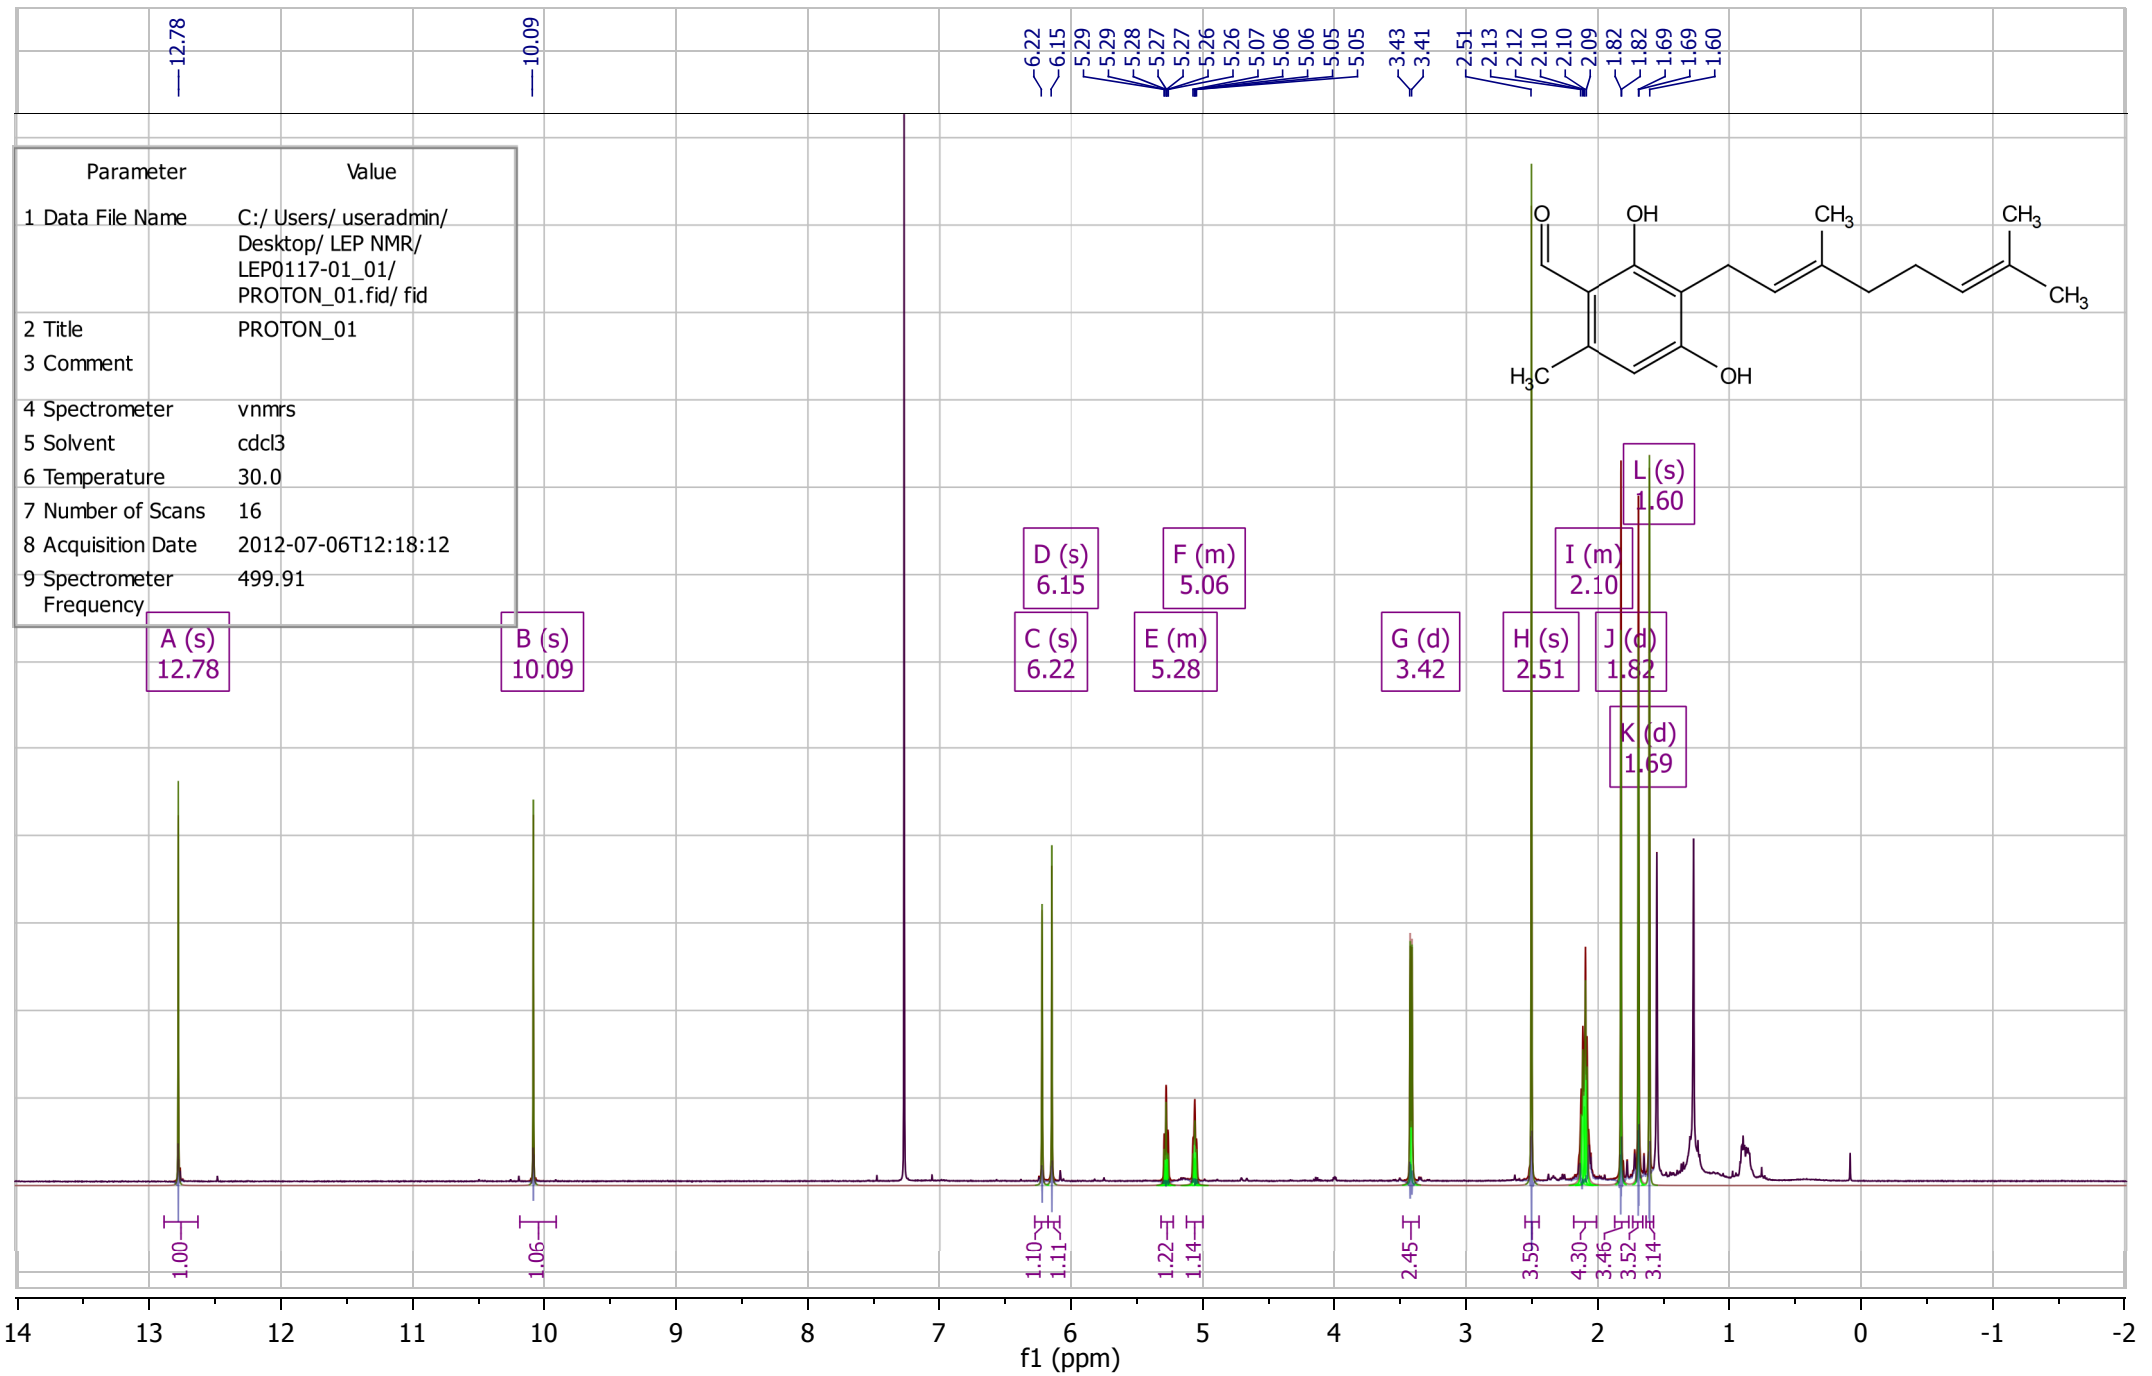

<sup>1</sup>H NMR (500 MHz, Chloroform-*d*) δ 12.78 (s, 1H), 10.09 (s, 1H), 6.22 (s, 1H), 6.15 (s, 1H), 5.31 – 5.22 (m, 1H), 5.12 – 5.00 (m, 1H), 3.42 (d, *J* = 7.2 Hz, 2H), 2.51 (s, 3H), 2.19 – 2.01 (m, 4H), 1.82 (d, *J* = 1.5 Hz, 3H), 1.69 (d, *J* = 1.6 Hz, 3H), 1.60 (s, 3H).
