# Supplementary material for: African trypanosomiasis: Synthesis & SAR enabling novel drug discovery of ubiquinol mimics for trypanosome alternative oxidase
Source: PubMed Central journal article supplement (PMC5697954; doi:10.1016/j.ejmech.2017.09.067), 2017-12-01
Supplement: mmc2.pdf [file mmc2.pdf]

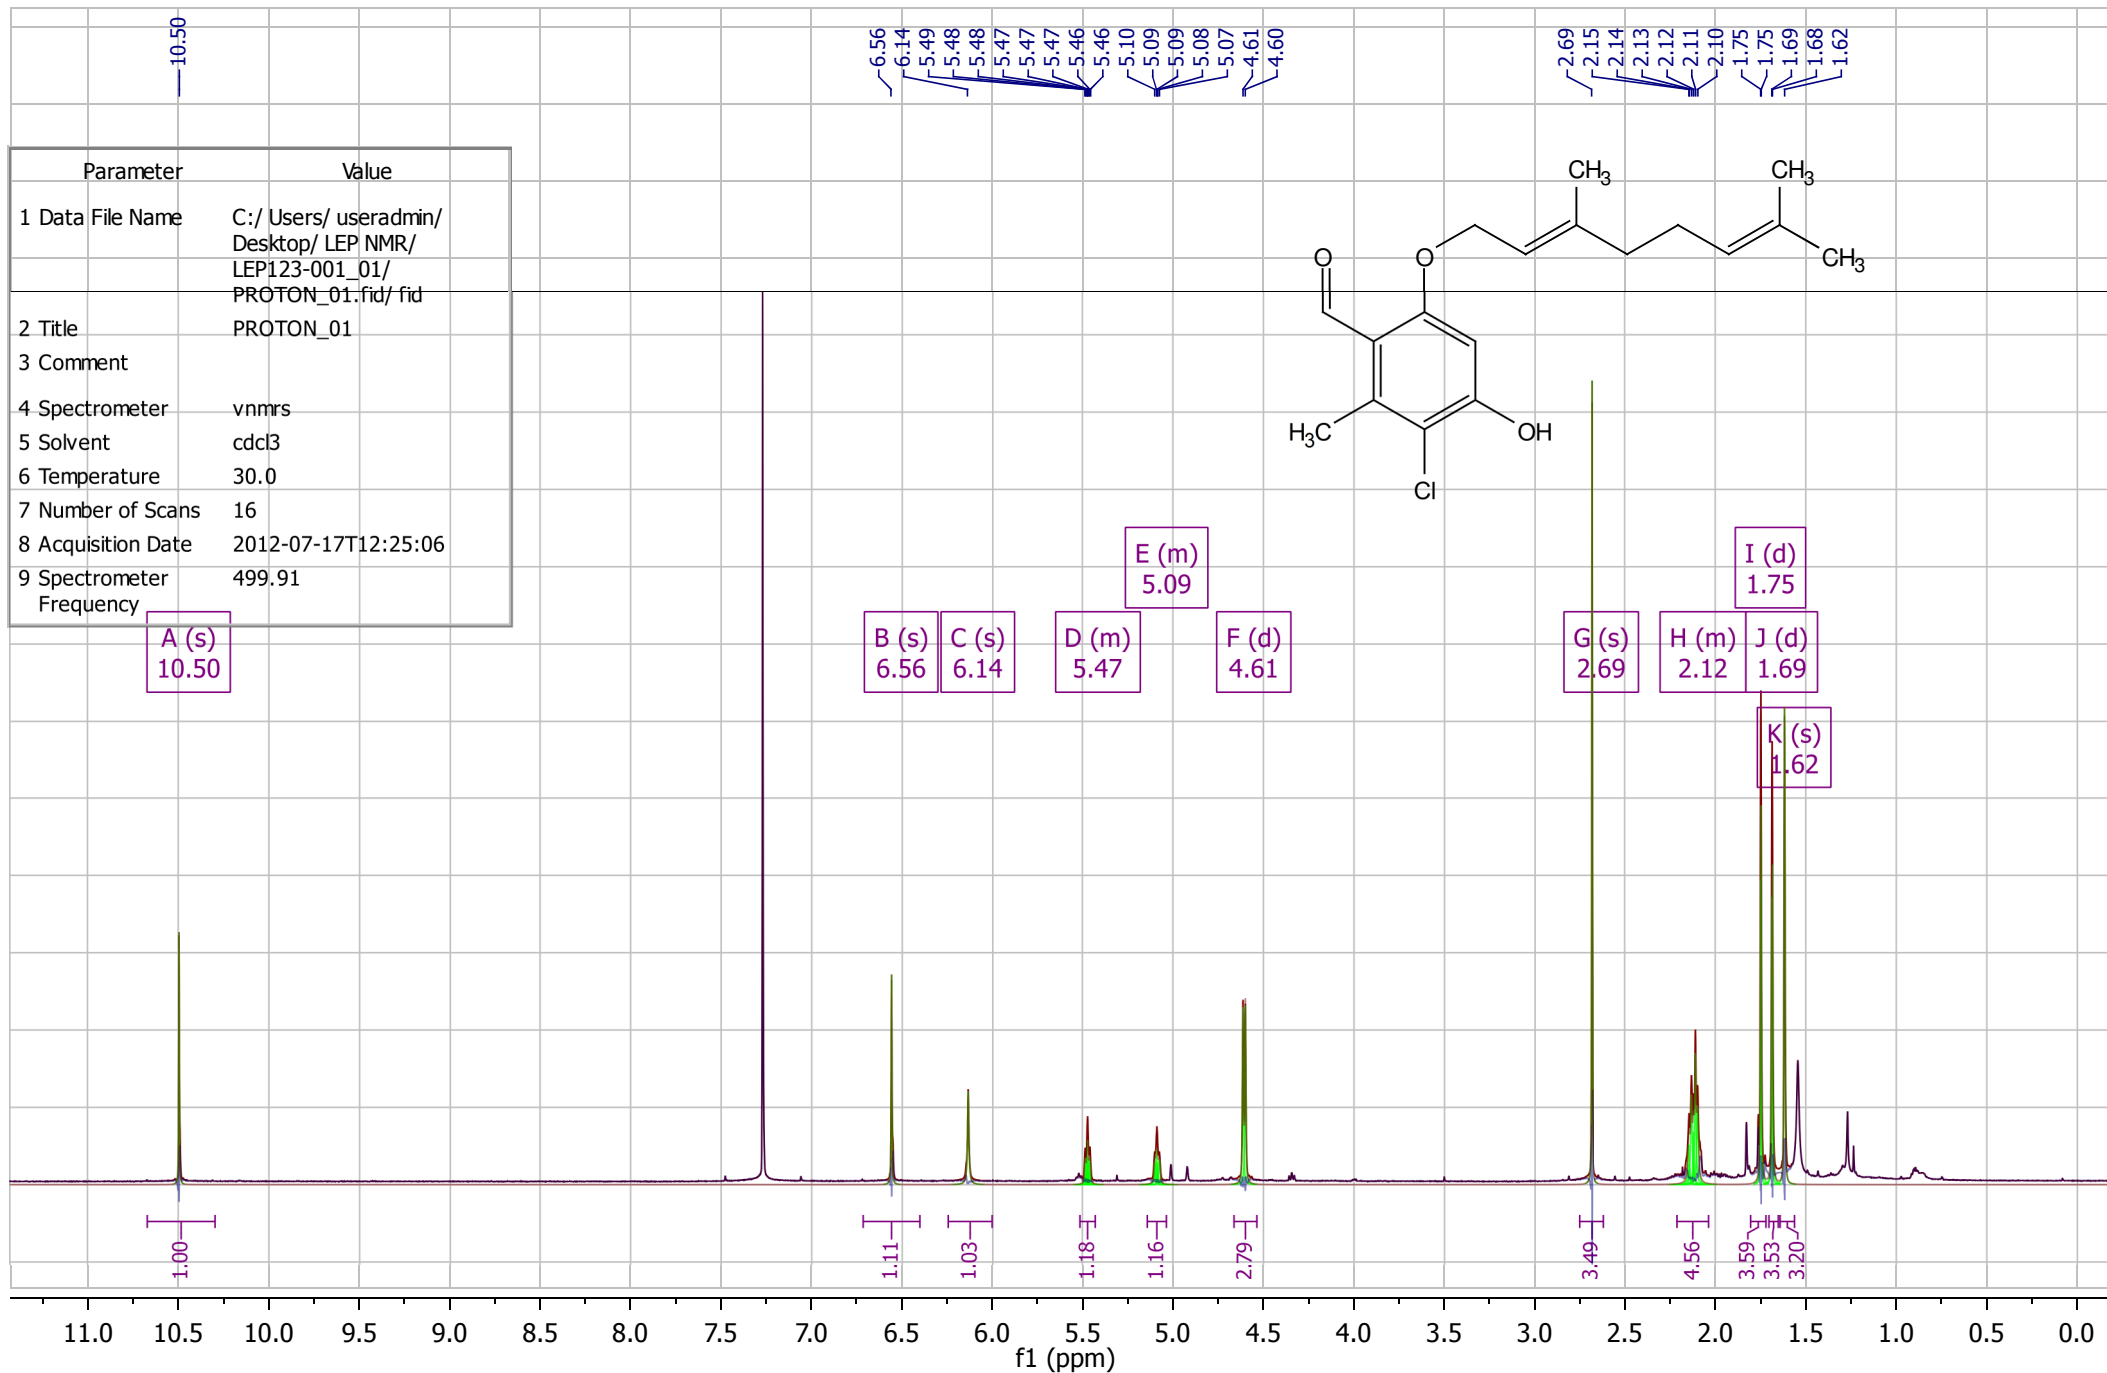

$^1\text{H NMR}$  (500 MHz, Chloroform-*d*)  $\delta$  10.50 (s, 1H), 6.56 (s, 1H), 6.14 (s, 1H), 5.51 – 5.43 (m, 1H), 5.14 – 5.04 (m, 1H), 4.61 (d,  $J = 6.5$  Hz, 2H), 2.69 (s, 3H), 2.21 – 2.04 (m, 3H), 1.75 (d,  $J = 1.5$  Hz, 3H), 1.69 (d,  $J = 1.8$  Hz, 3H), 1.62 (s, 3H).
