# Supplementary material for: African trypanosomiasis: Synthesis & SAR enabling novel drug discovery of ubiquinol mimics for trypanosome alternative oxidase
Source: PubMed Central journal article supplement (PMC5697954; doi:10.1016/j.ejmech.2017.09.067), 2017-12-01
Supplement: mmc3.pdf [file mmc3.pdf]

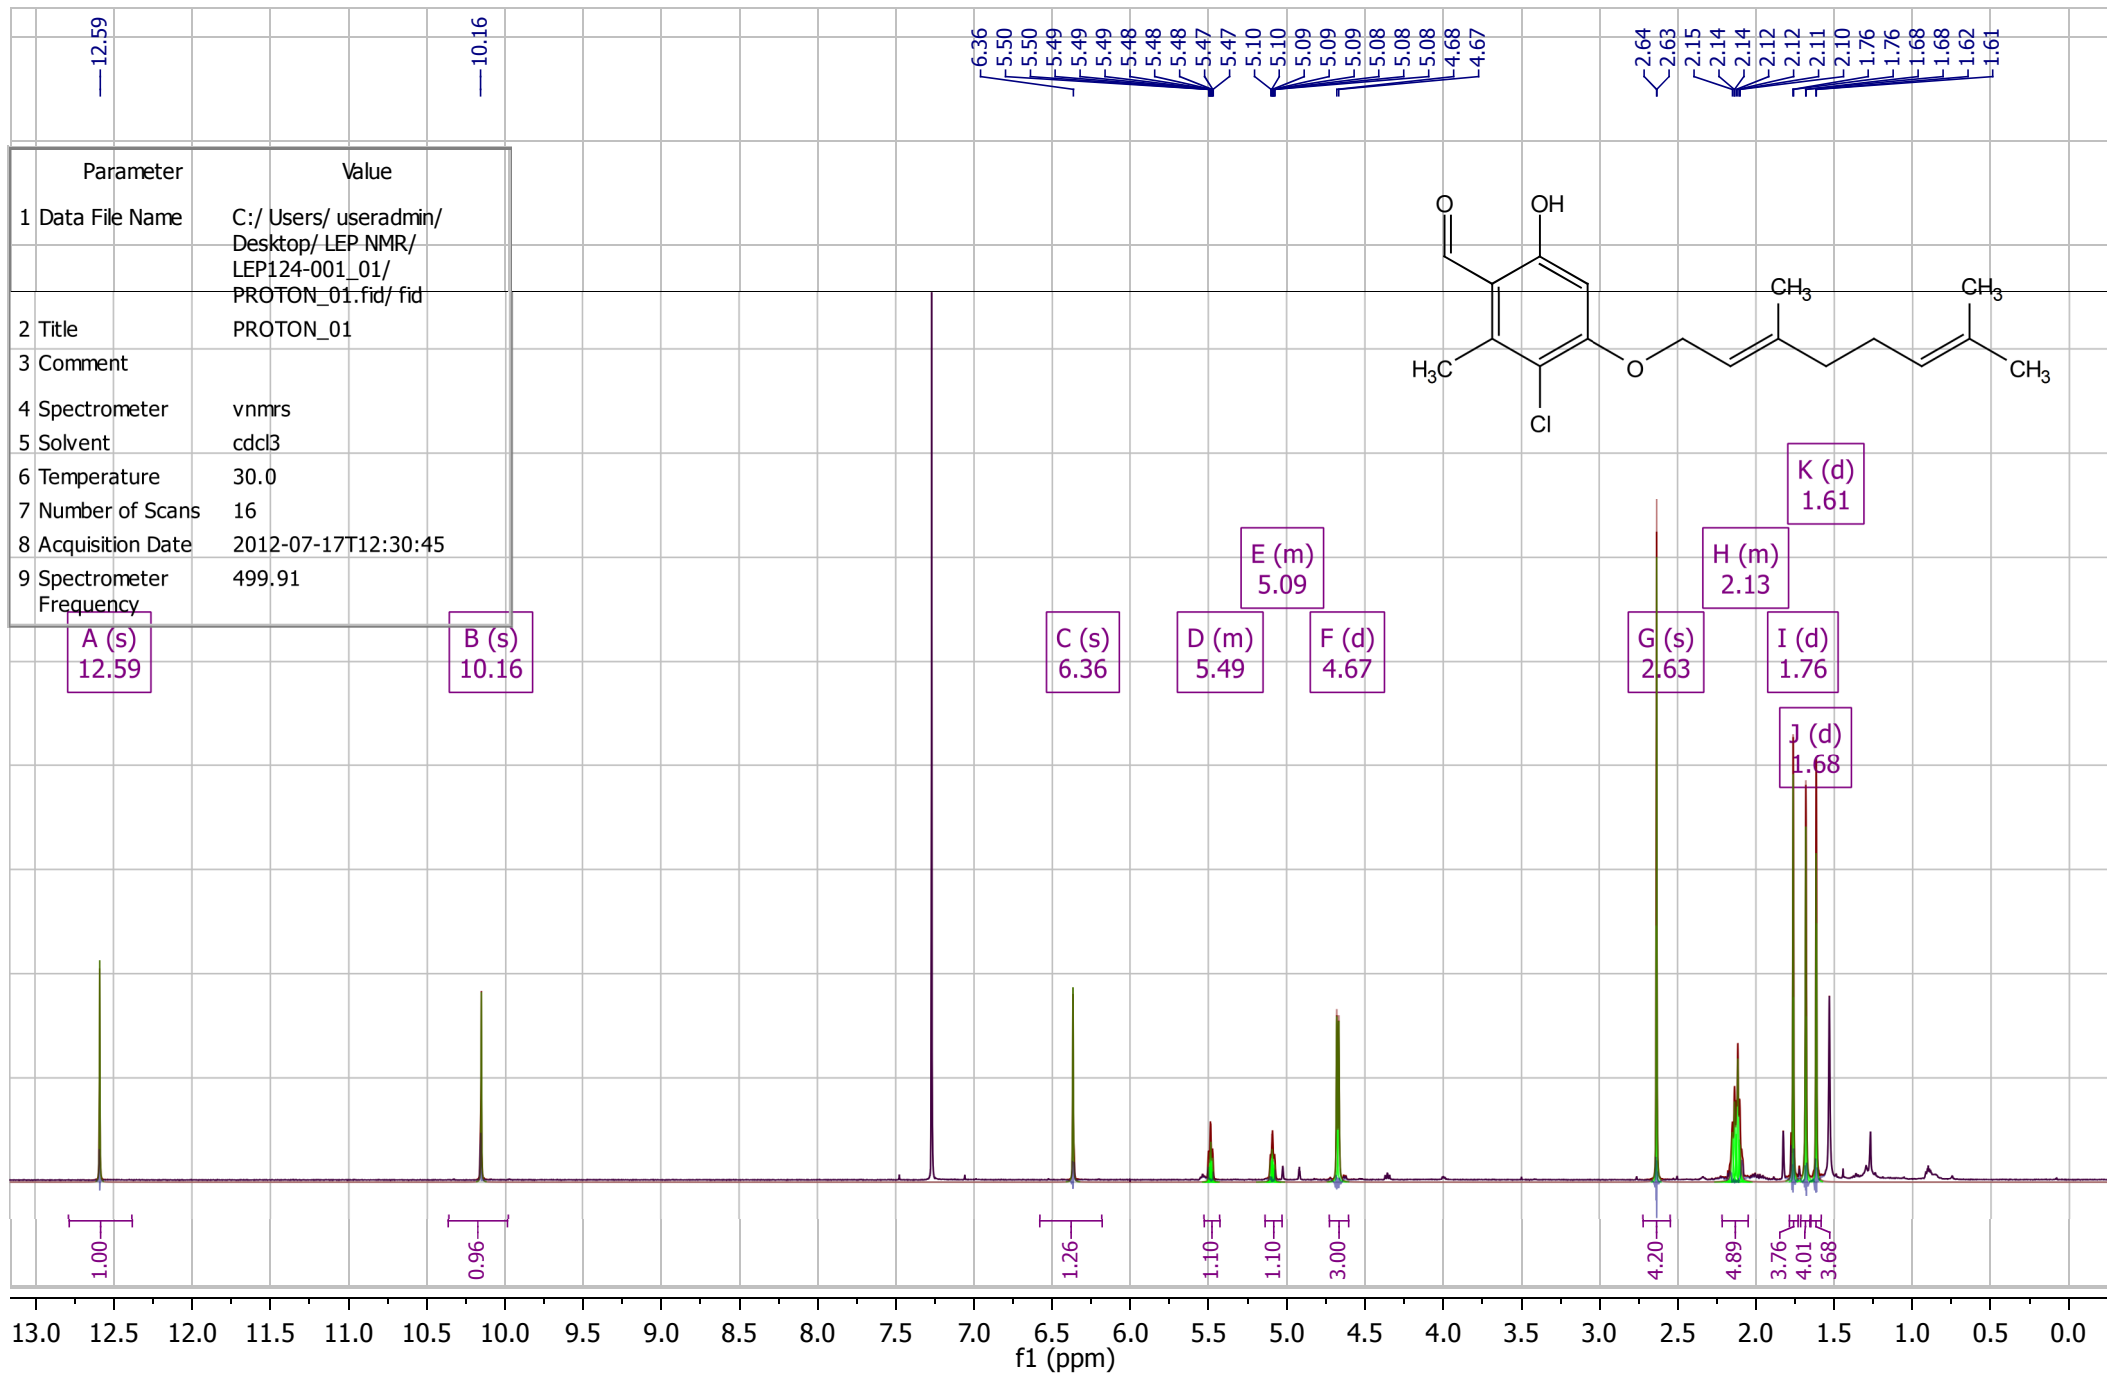

$^1\text{H NMR}$  (500 MHz, Chloroform-*d*)  $\delta$  12.59 (s, 1H), 10.16 (s, 1H), 6.36 (s, 1H), 5.53 – 5.43 (m, 1H), 5.14 – 5.03 (m, 1H), 4.67 (d,  $J$  = 6.5 Hz, 2H), 2.63 (s, 3H), 2.22 – 2.05 (m, 4H), 1.76 (d,  $J$  = 1.4 Hz, 3H), 1.68 (d,  $J$  = 1.6 Hz, 3H), 1.61 (d,  $J$  = 1.5 Hz, 3H).
