# Supplementary material for: African trypanosomiasis: Synthesis & SAR enabling novel drug discovery of ubiquinol mimics for trypanosome alternative oxidase
Source: PubMed Central journal article supplement (PMC5697954; doi:10.1016/j.ejmech.2017.09.067), 2017-12-01
Supplement: mmc4.pdf [file mmc4.pdf]

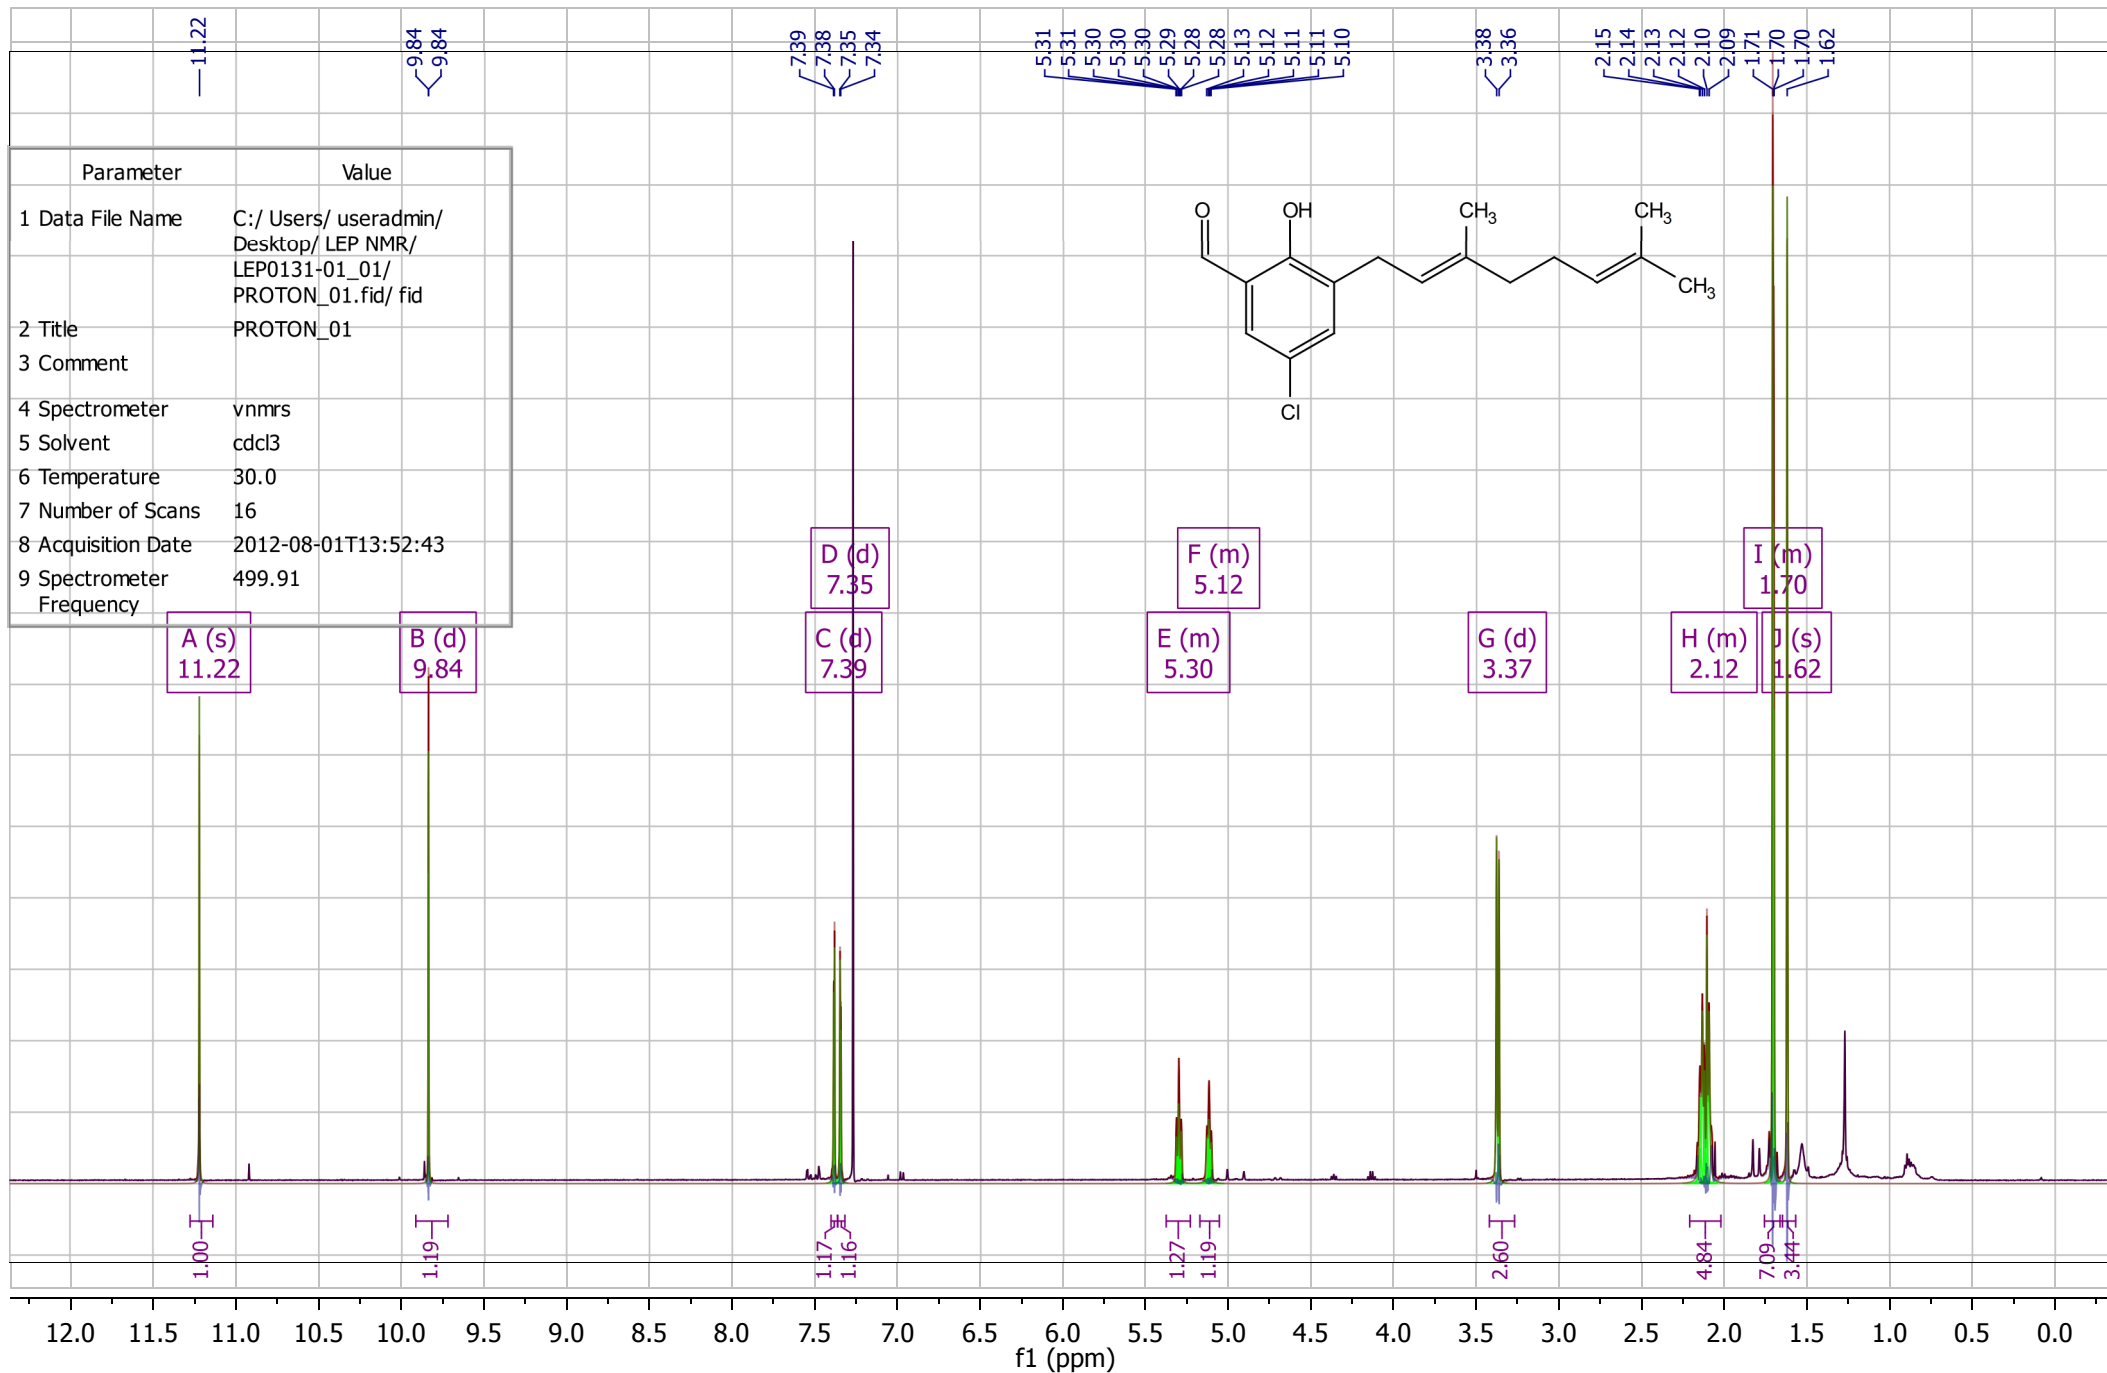

<sup>1</sup>H NMR (500 MHz, Chloroform-*d*) δ 11.22 (s, 1H), 9.84 (d, *J* = 0.8 Hz, 1H), 7.39 (d, *J* = 2.6 Hz, 1H), 7.35 (d, *J* = 2.6 Hz, 1H), 5.37 – 5.23 (m, 1H), 5.17 – 5.05 (m, 1H), 3.37 (d, *J* = 7.4 Hz, 2H), 2.21 – 2.02 (m, 4H), 1.76 – 1.65 (m, 6H), 1.62 (s, 3H).
