# Supplementary material for: African trypanosomiasis: Synthesis & SAR enabling novel drug discovery of ubiquinol mimics for trypanosome alternative oxidase
Source: PubMed Central journal article supplement (PMC5697954; doi:10.1016/j.ejmech.2017.09.067), 2017-12-01
Supplement: mmc5.pdf [file mmc5.pdf]

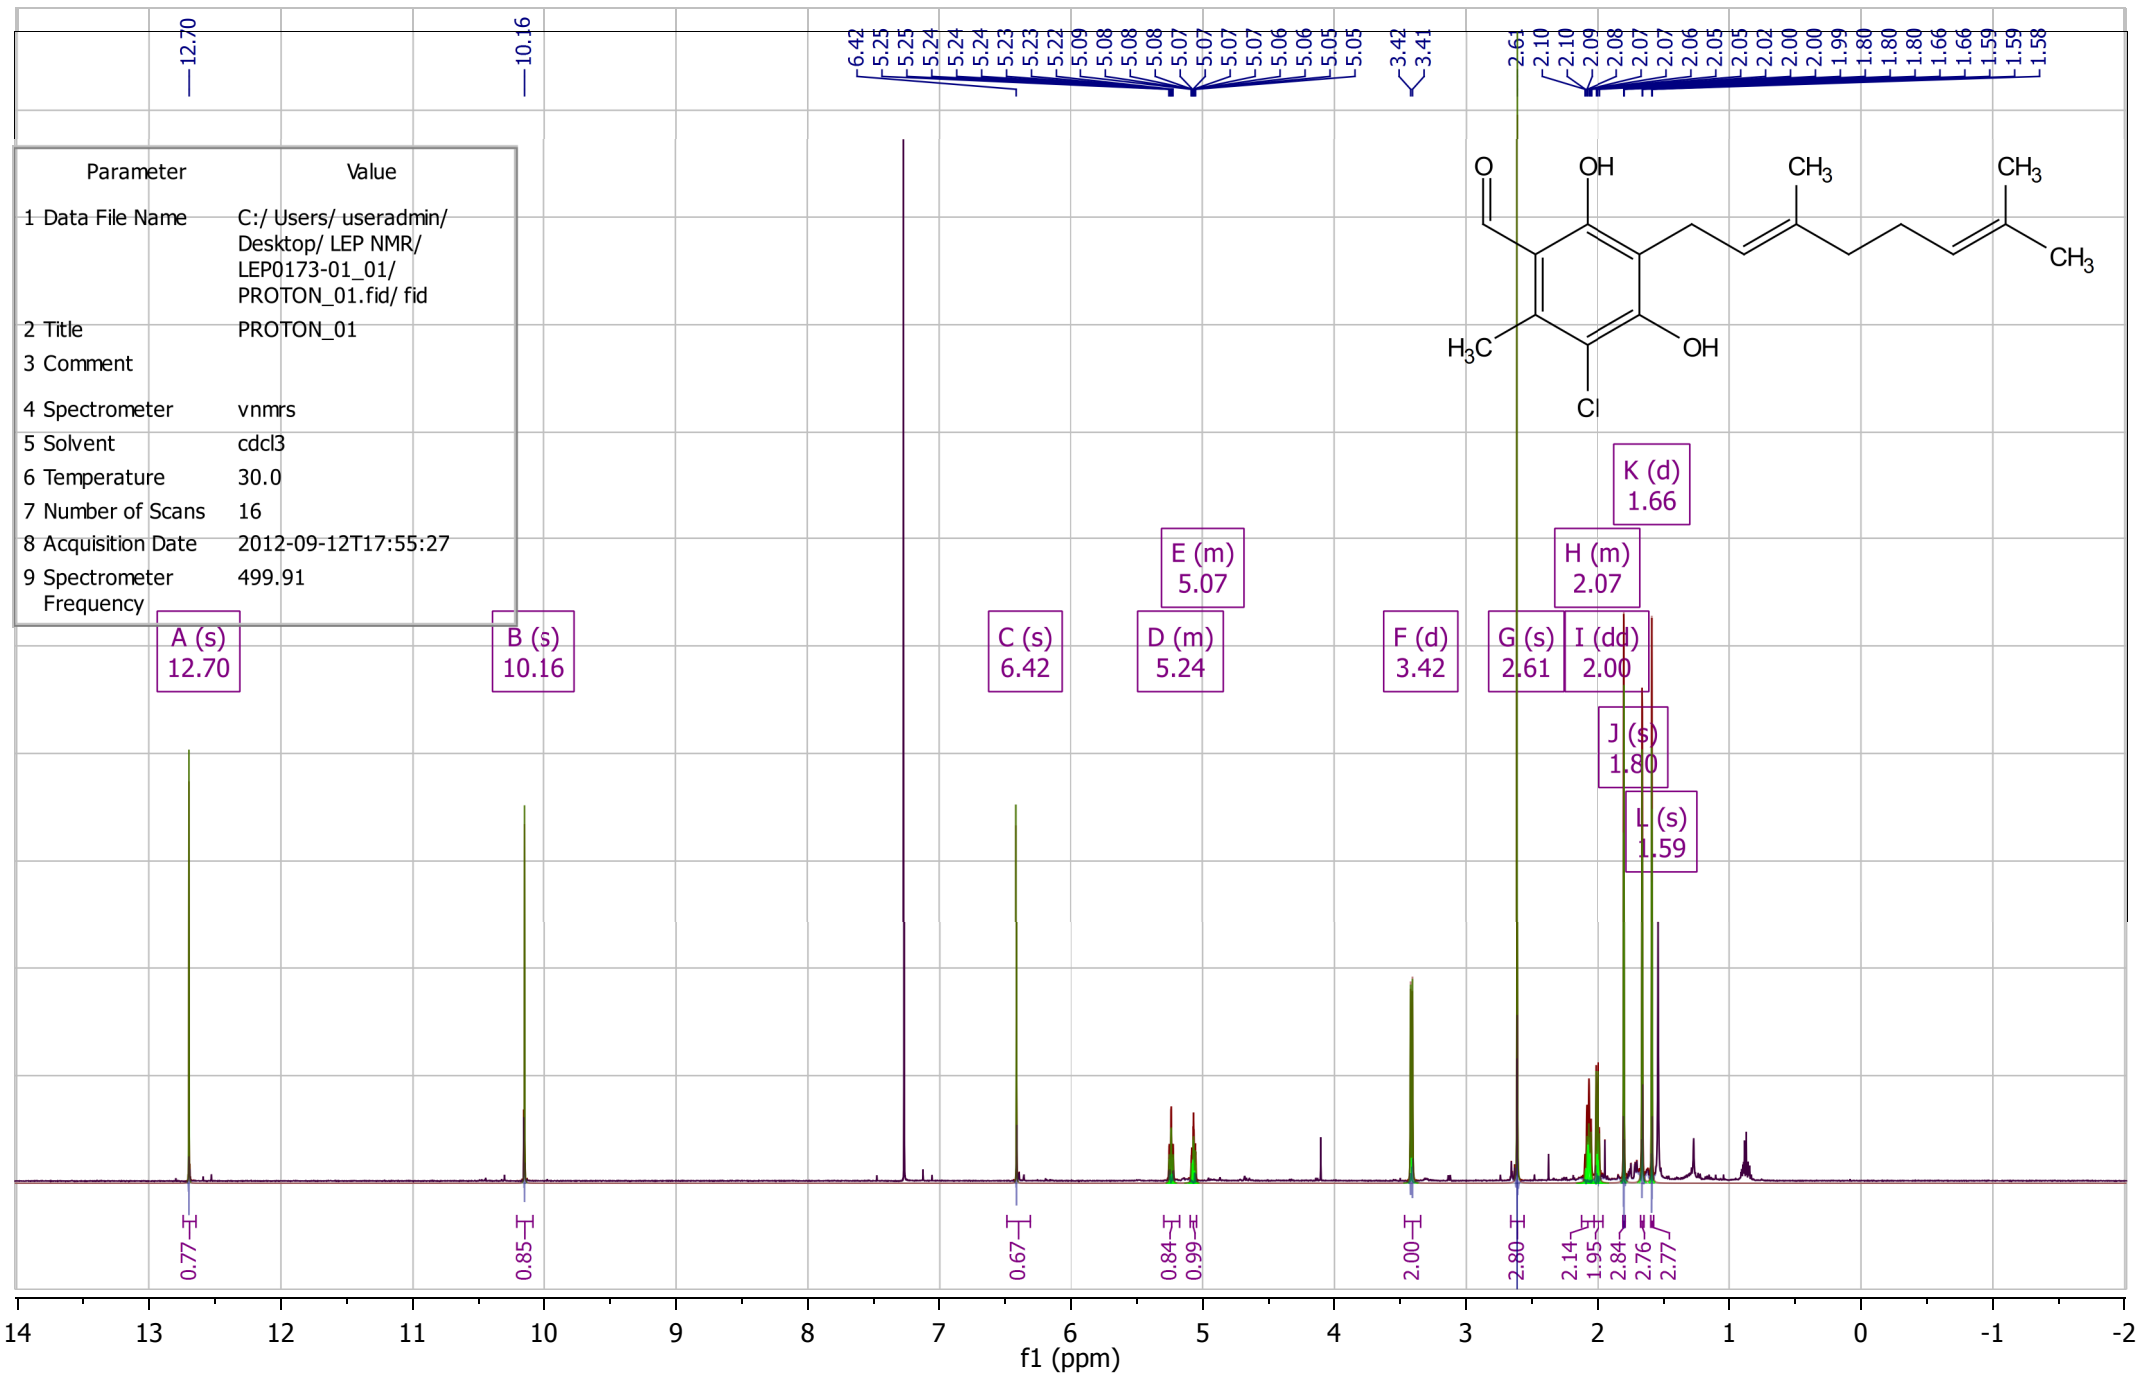

<sup>1</sup>H NMR (500 MHz, Chloroform-*d*) δ 12.70 (s, 1H), 10.16 (s, 1H), 6.42 (s, 1H), 5.29 – 5.17 (m, 1H), 5.09 – 5.05 (m, 1H), 3.42 (d, *J* = 7.1 Hz, 2H), 2.61 (s, 3H), 2.13 – 2.03 (m, 2H), 2.00 (dd, *J* = 9.0, 6.1 Hz, 2H), 1.80 (s, 3H), 1.66 (d, *J* = 1.4 Hz, 3H), 1.59 (s, 3H).
