# Supplementary material for: African trypanosomiasis: Synthesis & SAR enabling novel drug discovery of ubiquinol mimics for trypanosome alternative oxidase
Source: PubMed Central journal article supplement (PMC5697954; doi:10.1016/j.ejmech.2017.09.067), 2017-12-01
Supplement: mmc6.pdf [file mmc6.pdf]

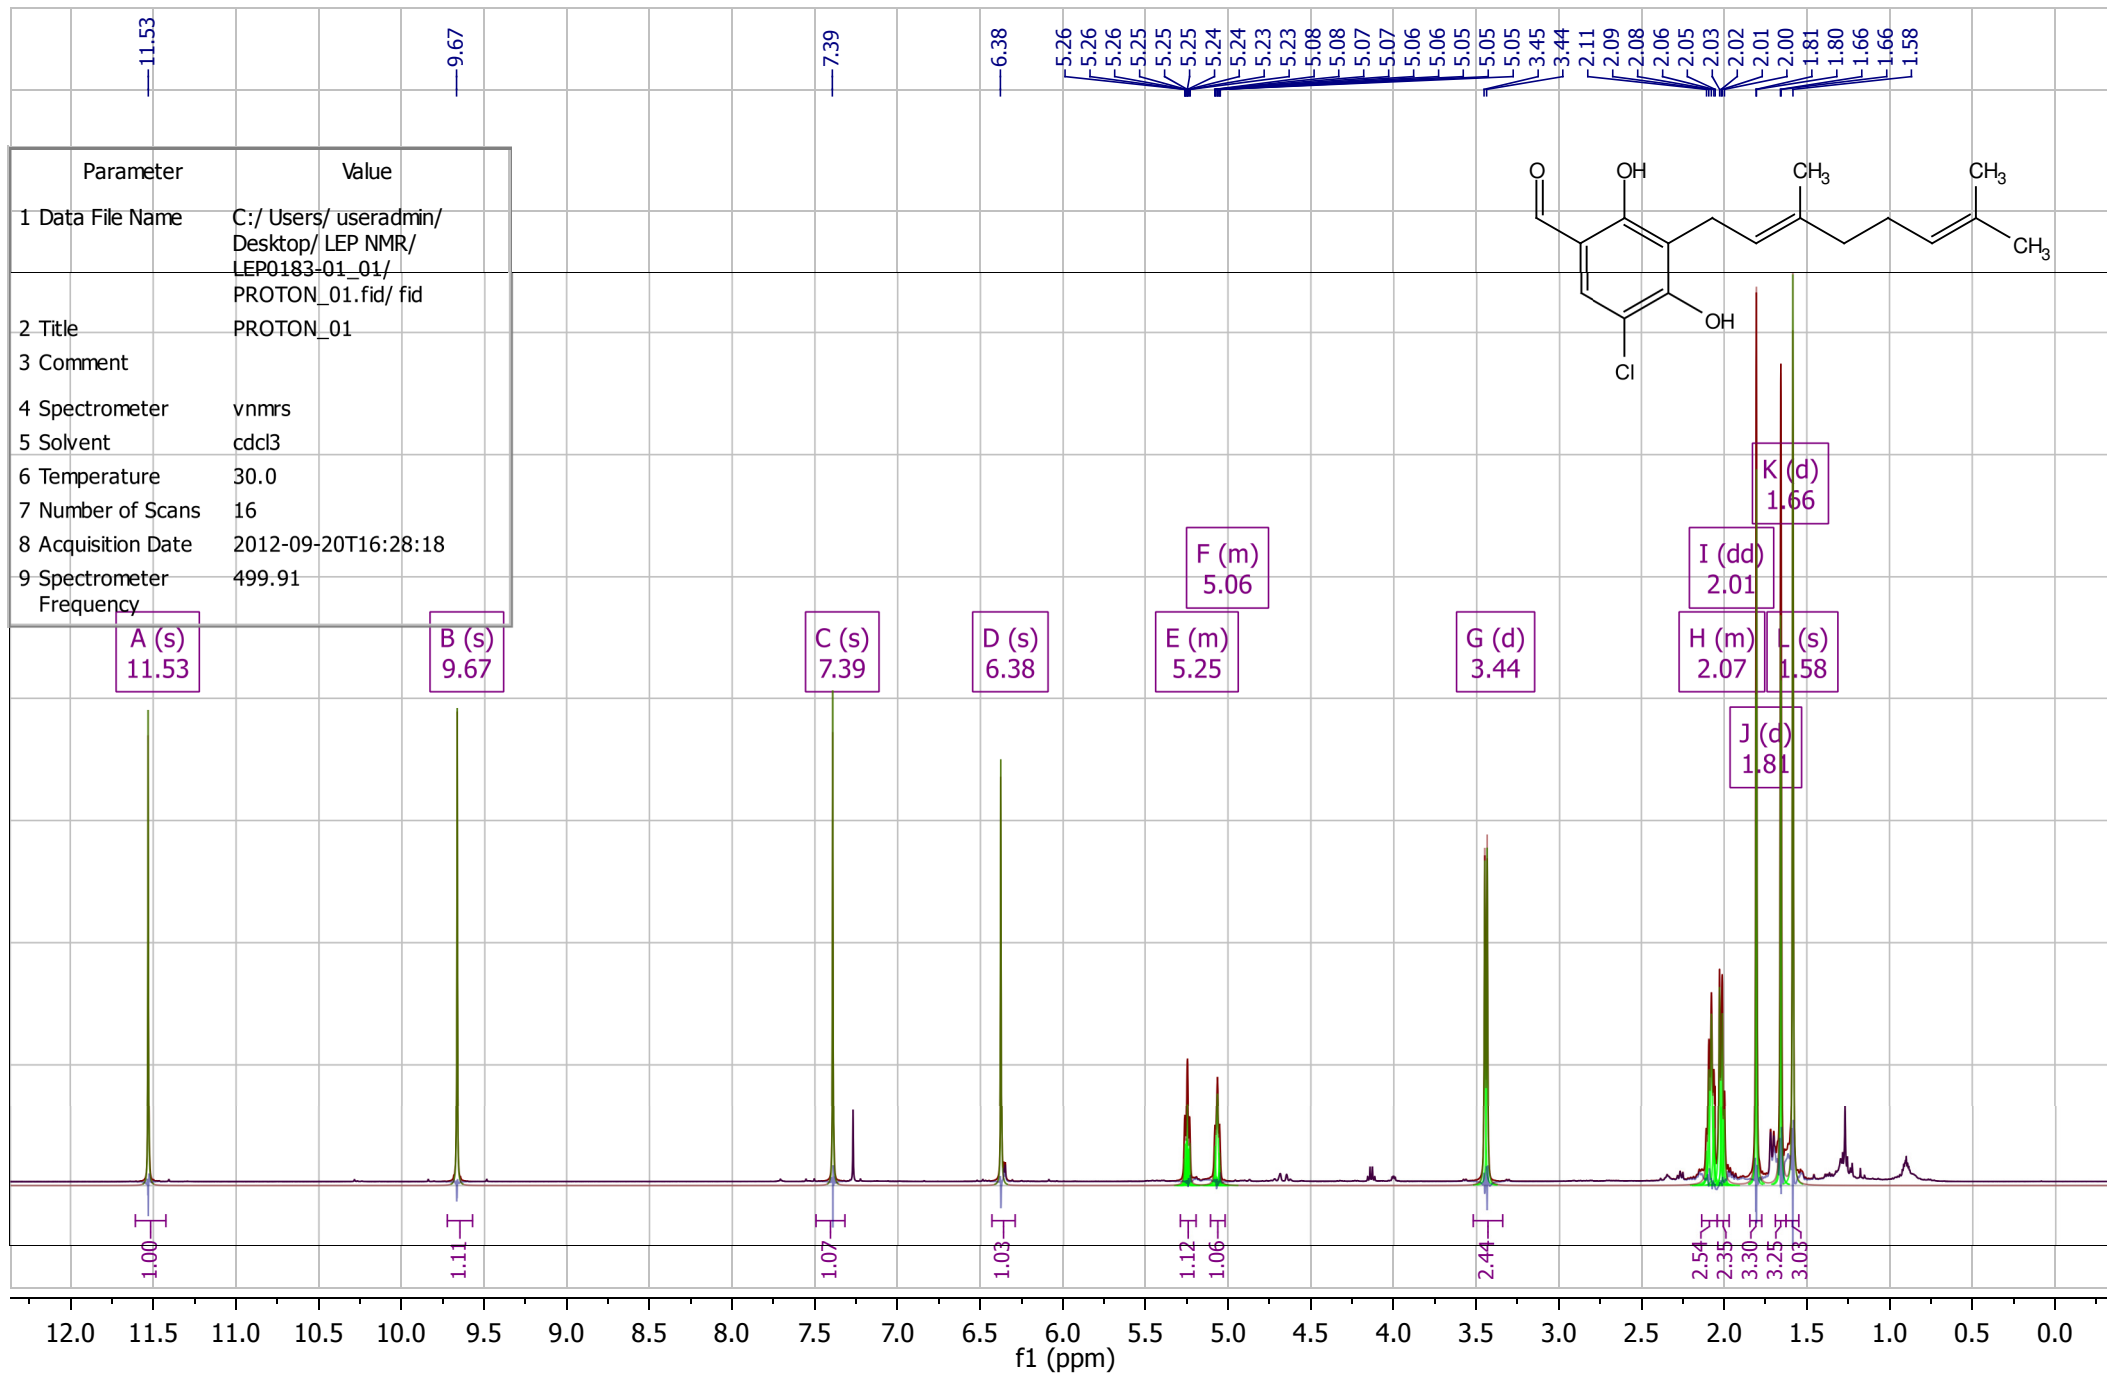

$^1\text{H NMR}$  (500 MHz, Chloroform-*d*)  $\delta$  11.53 (s, 1H), 9.67 (s, 1H), 7.39 (s, 1H), 6.38 (s, 1H), 5.29 – 5.19 (m, 1H), 5.10 – 5.02 (m, 1H), 3.44 (d,  $J = 7.2$  Hz, 2H), 2.13 – 2.04 (m, 2H), 2.01 (dd,  $J = 9.0, 6.2$  Hz, 2H), 1.81 (d,  $J = 1.5$  Hz, 3H), 1.66 (d,  $J = 1.7$  Hz, 3H), 1.58 (s, 3H).
