# Supplementary material for: African trypanosomiasis: Synthesis & SAR enabling novel drug discovery of ubiquinol mimics for trypanosome alternative oxidase
Source: PubMed Central journal article supplement (PMC5697954; doi:10.1016/j.ejmech.2017.09.067), 2017-12-01
Supplement: mmc7.pdf [file mmc7.pdf]

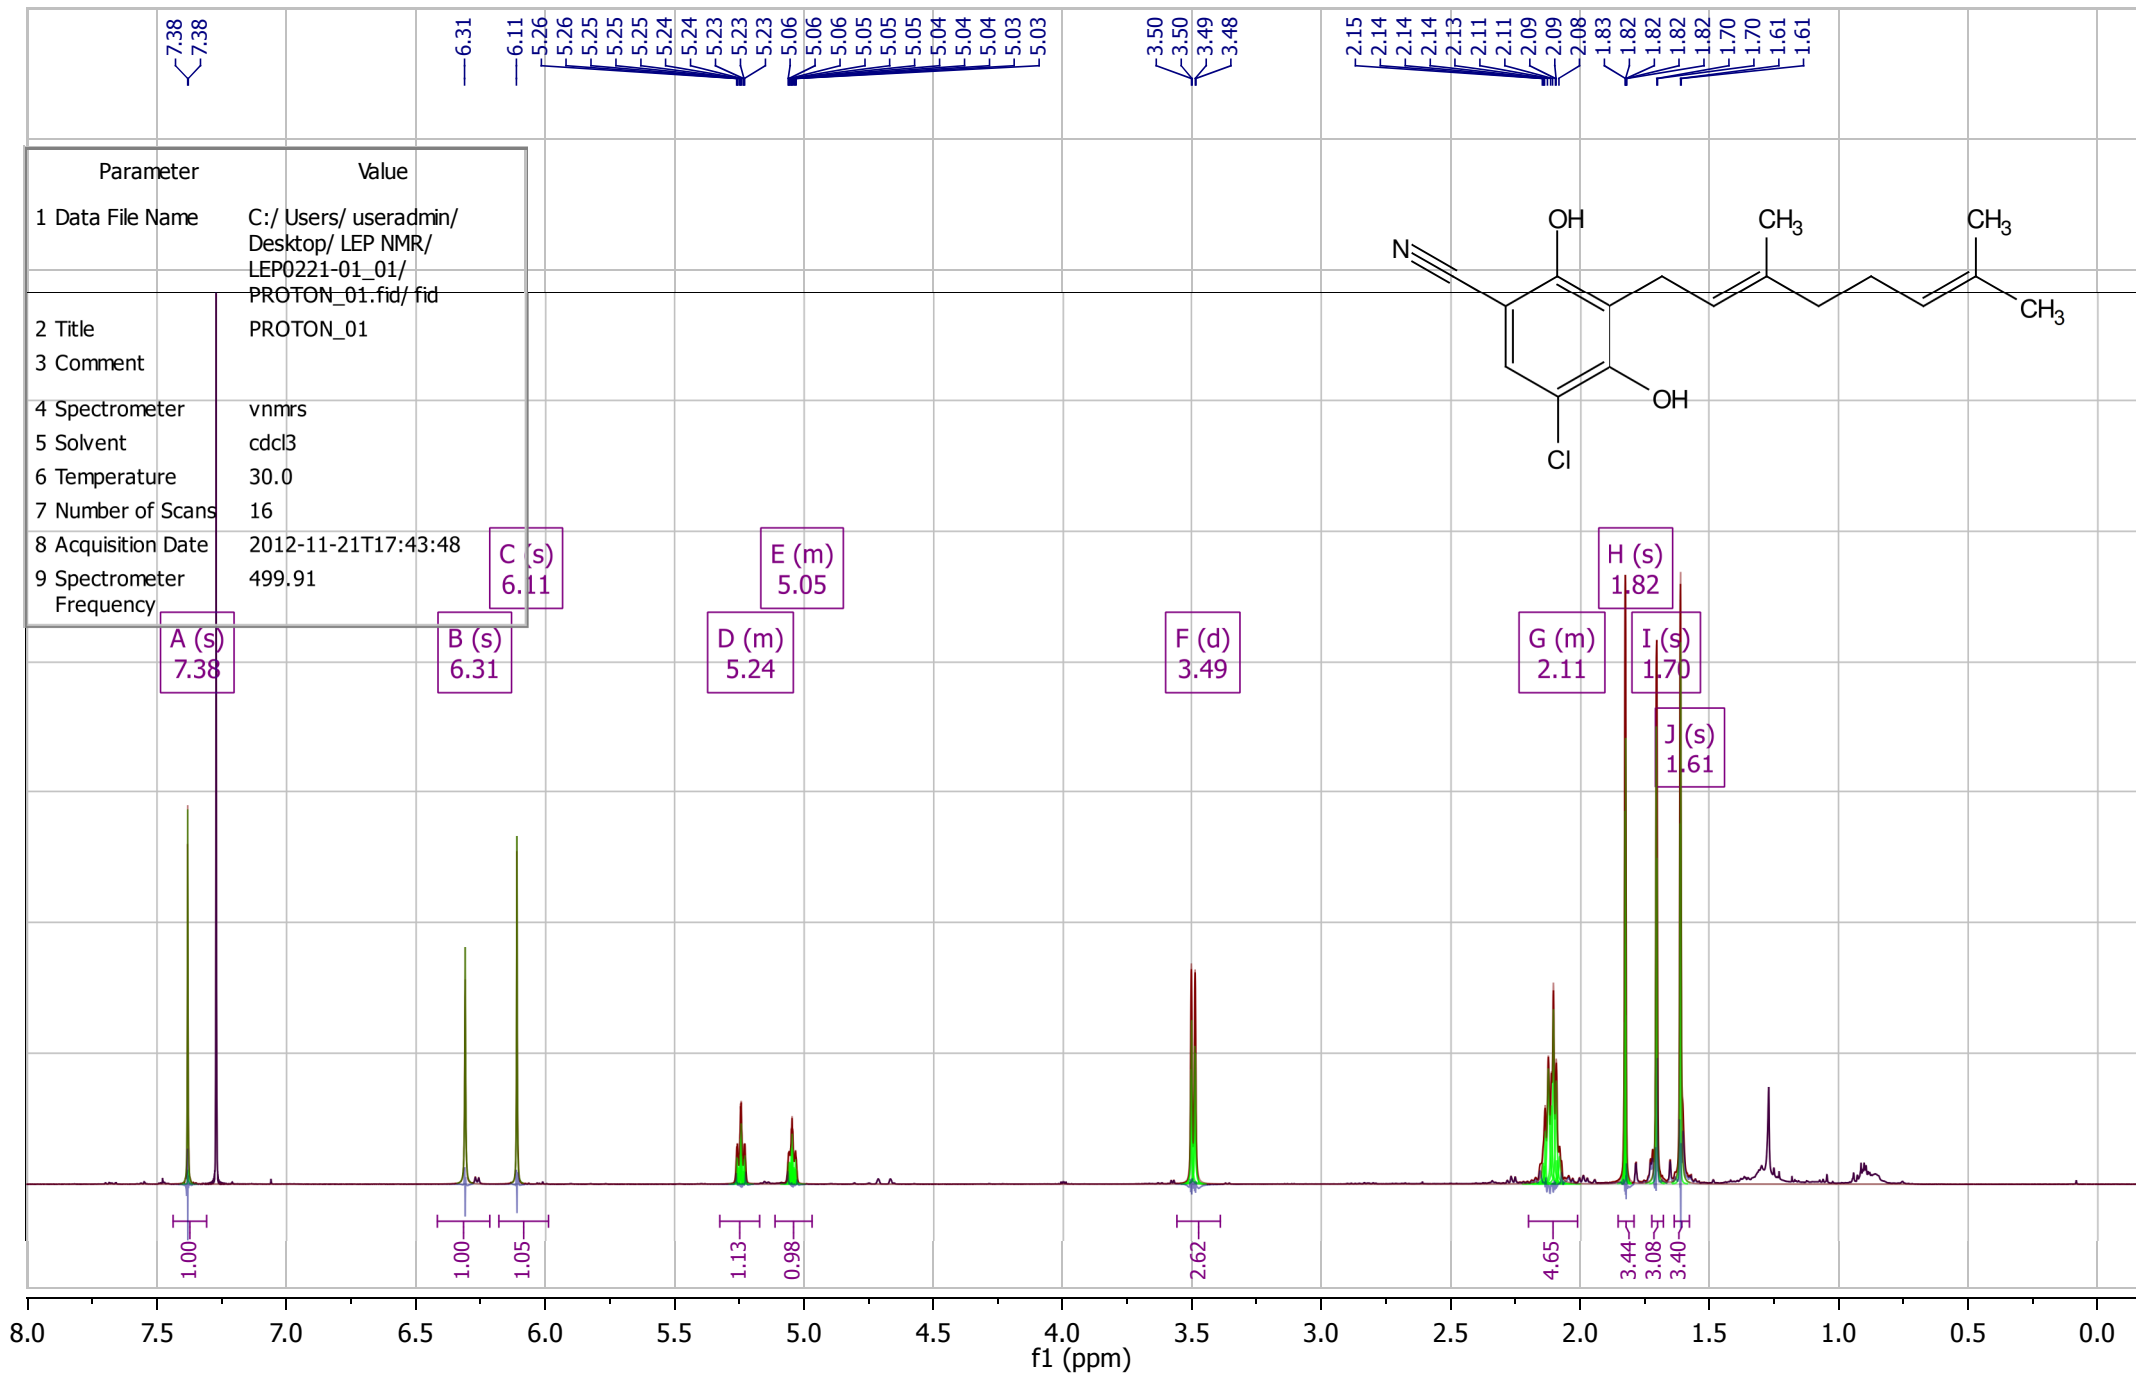

<sup>1</sup>H NMR (500 MHz, Chloroform-*d*)  $\delta$  7.38 (s, 1H), 6.31 (s, 1H), 6.11 (s, 1H), 5.33 – 5.17 (m, 1H), 5.11 – 4.97 (m, 1H), 3.49 (d,  $J = 7.4$  Hz, 3H), 2.20 – 2.01 (m, 4H), 1.82 (s, 3H), 1.70 (s, 3H), 1.61 (s, 3H).
